# Supplementary material
Source: PubMed Central journal article supplement (PMC7502882)
Supplement: Supplement_material.pdf [file Supplement_material.pdf]

**Annex 1.**

Table 3. Glossary of DESDE-LTC Main types of care (MTC), descriptions and common terms

| <b>Broad category</b>   | <b>Description</b>                                                                                                                                                                                                                                                                                                     | <b>Other common terms</b>                                                                                                        | <b>Main Type of Care (MTC)</b> |
|-------------------------|------------------------------------------------------------------------------------------------------------------------------------------------------------------------------------------------------------------------------------------------------------------------------------------------------------------------|----------------------------------------------------------------------------------------------------------------------------------|--------------------------------|
| <b>RESIDENTIAL</b>      | <i>Facilities which provide beds overnight for users for a purpose related to the clinical and social management of their health condition</i>                                                                                                                                                                         | <i>Accommodation, Hospital, Residential</i>                                                                                      | R                              |
| Hospital                | ACUTE. Users are admitted to hospital typically within 24h because of their crisis condition. Surveillance level and length of stay varies depending on the code                                                                                                                                                       | High Dependency Inpatient; Acute Care Unit; Intensive Care Unit; Psychiatric Assessment and Planning Unit                        | R1-R3.0                        |
|                         | NON ACUTE. Facilities which do not satisfy acute conditions. It can be time limited or indefinite depending on the code.                                                                                                                                                                                               | Sub-acute; Community Care Units; Extended Care Mental Health Rehabilitation Unit; Extended Treatment                             | R4,R6                          |
| Alternative to hospital | ACUTE. Facilities with 24-hours physician cover outside the location of a registered hospital                                                                                                                                                                                                                          | Crisis houses                                                                                                                    | R0, R3.1                       |
|                         | NON ACUTE. Facilities with 24h medical support on site. It can be time limited or indefinite depending on the code                                                                                                                                                                                                     | Therapeutic Communities                                                                                                          | R5, R7                         |
| Community               | HIGH INTENSITY. Facilities with 24h (non-medical) support. Length of stay (4weeks to indefinite) varies depending on the code.                                                                                                                                                                                         | Step up-Step Down (SUSD); Prevention and Recovery Care (PARC); Rehabilitation residences; Supported accommodation; Nursing homes | R8,R11                         |
|                         | MEDIUM AND LOW INTENSITY. Facilities with a range of support that varies from daily to fewer to 5 days a week depending on the code. Length of stay (4weeks to indefinite) varies depending on the code.                                                                                                               | Psychiatric Hostel; Group Houses; Supported Accommodation                                                                        | R9;R10,R12,R13                 |
| <b>DAY SERVICES</b>     | <i>Facilities available to several users at a time that provide some combination of planned treatment for users' needs, with regular opening hours during which they are normally available, and expect users to stay at the facilities beyond the periods during which they have face-to-face contact with staff.</i> | <i>Day services</i>                                                                                                              | D                              |

|                   |                                                                                                                                                                                                                                                                                                                                                 |                                                                                                                               |                                   |
|-------------------|-------------------------------------------------------------------------------------------------------------------------------------------------------------------------------------------------------------------------------------------------------------------------------------------------------------------------------------------------|-------------------------------------------------------------------------------------------------------------------------------|-----------------------------------|
| Health related    | ACUTE HEALTH. Users are admitted to the service because of their crisis condition. Admittance varies typically from 72h to 4 weeks, depending on the code                                                                                                                                                                                       | Day Hospital services (non-existent in Australia)<br>Outpatient Electro convulsive therapy services;<br>Chemotherapy services | D0-D1                             |
|                   | NON ACUTE HEALTH. Typically, at least 20% of staff are qualified health professionals with at least a four year university degree. Depending on the code it can be high (equivalent to 4 half days) or low intensity                                                                                                                            | Rehabilitation Services, Therapeutic day services (e.g education services with clinical support,)                             | D4.1, D8.1                        |
| Other             | WORK RELATED. Facilities which provide users with the opportunity to work. The salary varies depending on the code: normal wage; 50% of typical wage; not paid or symbolic pay.                                                                                                                                                                 | Disability Enterprises; Social firms; Workers Coop;<br>Occupational centres; Integration workplace; sheltered work            | D2-D3, D6-D7                      |
|                   | OTHER. Facilities providing education, social or other non-health related care. Depending on the code it can be high (equivalent to 4 half days) or low intensity. Structured (activities available more than 25% of opening hours) or non-structured.                                                                                          | Social Clubs; Club Houses; Vocational training;<br>psychiatric drop-in centre, Day centres                                    | D4.2-D4.4; D8.2-D8.4; D5; D9; D10 |
| <b>OUTPATIENT</b> | <i>Facilities providing contact between staff and users for some purpose related to management of their condition that are not provided as a part of delivery of residential or day and structured activity care teams, as defined below.</i>                                                                                                   | <i>Community or ambulatory care; psychosocial support</i>                                                                     | O                                 |
| Health            | ACUTE MOBILE. The service provides assessment and initial treatment in response to a health related crisis, typically same day response during working hours or at least within 72 hours after the care demand. At least 50% of contacts take place outside the service (eg user's home). Depending on the code it can be 24h or limited hours. | Crisis and Assessment Teams                                                                                                   | O1.1, O2.1                        |
|                   | ACUTE NON MOBILE. The service provides assessment and initial treatment in response to a health related crisis, the purpose is to treat the user in the service, in no case mobile attention exceeds 50% of overall activity. Depending on the code it can be 24h or limited hours.                                                             | Emergency Units or Depts, Psychiatric Emergency;<br>Psychiatric Liaison                                                       | O3.1, O4.1                        |
|                   | NON ACUTE MOBILE. The service does not fulfil criteria for acute care. At least 50% of contacts take place outside the service (eg user's home). Depending on the code it can be high intensity (3 times/week), medium intensity (once a fortnight), low intensity (once a month or less)                                                       | Mobile Support and Treatment Team;<br>Assertive Community Treatment                                                           | O5.1, O6.1, O7.1                  |

|                          |                                                                                                                                                                                                                                                                                                                                  |                                                                                                                                     |                   |
|--------------------------|----------------------------------------------------------------------------------------------------------------------------------------------------------------------------------------------------------------------------------------------------------------------------------------------------------------------------------|-------------------------------------------------------------------------------------------------------------------------------------|-------------------|
|                          | NON ACUTE NON MOBILE. The service does not fulfil criteria for acute care. The purpose is to treat the user in the service, in no case mobile attention exceeds 50% of overall activity. Depending on the code it can be high intensity (3times/week), medium intensity (once a fortnight), low intensity (once a month or less) | Outpatients; Clinic services, Dual Diagnosis; Community Care/Continuing Care, Outpatients MH units in general hospitals (Australia) | O8.1, O9.1, O10.1 |
| Social (non core health) | NON ACUTE NON MOBILE. As in non acute non mobile health but providing other type of care different than health (staff typically include social worker, monitor, occupational therapist)                                                                                                                                          | Daily Living, Living Skills Development or Support eg: Art therapy classes, financial or budgeting support (centre based)           | O8.2, O9.2, O10.2 |
|                          | NON ACUTE MOBILE. As in non acute mobile health but providing other type of care different than health (social, work)                                                                                                                                                                                                            | Personal Helpers and Mentors; Psychosocial outreach support                                                                         | O5.2, O6.2, O7.2  |
|                          | ACUTE NON MOBILE. As in acute non mobile health but providing other type of care different than health (social, work)                                                                                                                                                                                                            | Family and sexual violence crisis services                                                                                          | O3.2, O4.2        |
|                          | ACUTE MOBILE. As in acute mobile health but providing other type of care different than health (social, work)                                                                                                                                                                                                                    |                                                                                                                                     | O1.2, O2.2        |
| <b>ACCESSIBILITY</b>     | Facilities which main aim is to facilitate accessibility to care for users with a specific condition                                                                                                                                                                                                                             | <i>Accessibility services</i>                                                                                                       | A                 |
|                          | Services that facilitates the access to information; Services that facilitates physical mobility; services that facilitates personal accompaniment; Services that facilitates case coordination; Services that facilitates access to employment or housing.                                                                      | Partners In Recovery (now ceased), Access to Employment services; Tenancy Support                                                   | A1-A5             |
| <b>INFORMATION</b>       | <i>Facilities that provide users from the defined target group with information and/or an assessment of their needs. Does not entail subsequent monitoring/follow-up or direct care provision</i>                                                                                                                                | <i>Information and Assessment services</i>                                                                                          | I                 |
| Information              | Facilities which main aim is to provide users from the defined target group with information for their needs. This care team does not entail subsequent monitoring/follow-up or direct care provision.                                                                                                                           | Support helplines; Lifeline; Hotline, Information services; Leaflets; Websites                                                      | I2                |

|            |                                                                                                                                                                                     |                                                                         |    |
|------------|-------------------------------------------------------------------------------------------------------------------------------------------------------------------------------------|-------------------------------------------------------------------------|----|
| Assessment | Facilities which main aim is to provide users from the defined target group with an evaluation of a health condition, functioning, environment, behaviour, or need for intervention | A triage service health related or Telephone triage Intake & Assessment | I1 |
|------------|-------------------------------------------------------------------------------------------------------------------------------------------------------------------------------------|-------------------------------------------------------------------------|----|
